# Supplementary material for: The Radiosensitizing Effect of AZD0530 in Glioblastoma and Glioblastoma Stem-Like Cells
Source: Oxford University Press journal article supplement (doi:10.1158/1535-7163.mct-20-0883), 2021-06-22
Supplement: 15357163mct200883-sup-253789_2_supp_7129172_qtttry.pdf [file 15357163mct200883-sup-253789_2_supp_7129172_qtttry.pdf]

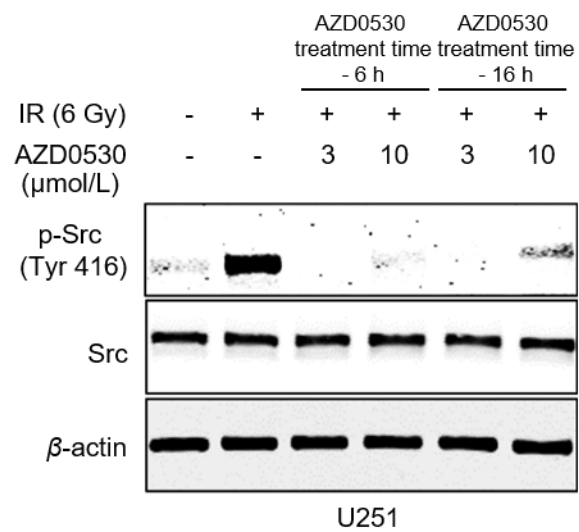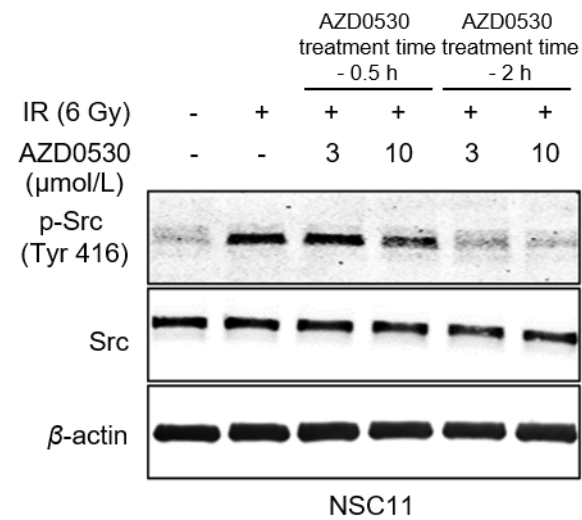

Supplementary Fig. S1. The dosage and timing of AZD0530 to inhibit radiation-induced phosphorylation of SRC in GBM and GSCs. The addition of AZD0530 at 6 or 16h and 3 or 10  $\mu\text{mol/L}$  for U251 and at 30m and 2h and 3 or 10  $\mu\text{mol/L}$  for NSC11.
